# Neural Basis of Pain Empathy Dysregulations in Mental Disorders – A Pre-registered Neuroimaging Meta-Analysis

## Authors:

Jingxian He <sup>a, b</sup>, Mercy Chepngetich Bore <sup>a, b</sup>, Heng Jiang <sup>a, b</sup>, Xianyang Gan <sup>a, b</sup>, Junjie Wang <sup>a, b</sup>, Jialin Li <sup>c</sup>, Xiaolei Xu <sup>f</sup>, Lan Wang <sup>a, b</sup>, Kun Fu <sup>a, b</sup>, Liyuan Li <sup>a</sup>, Bo Zhou <sup>a</sup>, Keith Kendrick <sup>a, b</sup>, Benjamin Becker<sup>a, b, c, d \*</sup>

## \*Corresponding Author

## Affiliations:

<sup>a</sup> The Center of Psychosomatic Medicine, Sichuan Provincial Center for Mental Health, Sichuan Provincial People's Hospital, University of Electronic Science and Technology of China, Chengdu, China;

<sup>b</sup> School of Life Science and Technology, University of Electronic Science and Technology of China, Chengdu, China;

<sup>c</sup> State Key Laboratory of Brain and Cognitive Sciences, The University of Hong Kong, Hong Kong, China;

<sup>d</sup> Department of Psychology, The University of Hong Kong, Hong Kong, China;

<sup>e</sup> Max Planck School of Cognition, Stephanstrasse 1a, Leipzig, Germany

<sup>f</sup> School of Psychology, Shandong Normal University, Jinan, China.

## Corresponding Author:

Full name: Benjamin Becker

Email addresses: [ben\\_becker@gmx.de](mailto:ben_becker@gmx.de)

Postal/mail address: University of Electronic Science and Technology of China, No.2006 Xiyuan Avenue, Hi-Tech Zone (West), Chengdu, China; 611731

Telephone number: 86-28-61830670

**Keywords:** Empathy, Pain, fMRI, Mental Disorder, Psychiatry

## 1 **Abstract**

2 Pain empathy represents a fundamental building block of several social functions, which have  
3 been demonstrated to be impaired across various mental disorders by accumulating evidence  
4 from case-control functional magnetic resonance imaging (fMRI) studies. However, it remains  
5 unclear whether the dysregulations are underpinned by robust neural alterations across mental  
6 disorders. This study utilized coordinate-based meta-analyses to quantitatively determine  
7 robust markers of altered pain empathy across mental disorders. To support the interpretation  
8 of the findings exploratory network-level and behavioral meta-analyses were conducted. The  
9 results revealed patients with mental disorders exhibited increased pain empathic reactivity in  
10 the left anterior cingulate gyrus, adjacent medial prefrontal cortex, and right middle temporal  
11 gyrus, yet decreased activity in the left cerebellum IV/V and left middle occipital gyrus  
12 compared to controls. The hyperactive regions showed network-level interactions with the core  
13 default mode network (DMN) and were associated with affective and social cognitive domains.  
14 The findings suggest that pain-empathic alterations across mental disorders are underpinned by  
15 excessive empathic reactivity in brain systems involved in empathic distress and social  
16 processes, highlighting a shared therapeutic target to normalize basal social dysfunctions in  
17 mental disorders.

## 18 **Introduction**

19 Pain empathy, defined as the capacity to understand and share the emotional and sensory  
20 aspects of pain felt by another individual (Fitzgibbon et al., 2010), plays a pivotal role in  
21 various social functions, including prosocial behavior (to motivate altruistic behavior)  
22 (Hartmann et al., 2022), social bonding (foster a sense of trust and emotional connection), and  
23 cooperation (Karos et al., 2020; Novembre et al., 2015), as well as adaptive emotion regulation  
24 (to improve understanding and expression of emotional experiences) (Fitzgibbon et al., 2010).  
25 Moreover, impaired empathy has been associated with a decline in social functioning, which is  
26 considered a key feature of psychotic spectrum disorders (Kuis et al., 2021), and across  
27 individuals with mental disorders deficits in the cognitive and affective component of empathy  
28 may lead to difficulties in interpreting the thoughts and feelings of others (Henry et al., 2008),  
29 potentially leading to reduced socialization and increased interpersonal distress (Bailey et al.,  
30 2008). Dysfunctions in these domains have been widely observed in common mental disorders  
31 (see ref. (Kennedy and Adolphs, 2012)), and these dysfunctions may extend beyond traditional  
32 diagnostic categories (see ref. (Cuthbert, 2014)). Emerging evidence from studies involving  
33 individuals with mental disorders and high levels of pathology-related traits indicate shared  
34 pain empathic dysfunctions (see refs. (Corbera et al., 2014; Li et al., 2019; Meng et al., 2019;  
35 Xu et al., 2020; Zhang et al., 2023)), with most studies reporting increased empathic distress in  
36 individuals with depression, autism spectrum disorders (ASD), schizophrenia (SCH) and  
37 elevated levels of alexithymia (Corbera et al., 2014; Guhn et al., 2020; Horan et al., 2016;  
38 Lamm et al., 2016), although results remained inconsistent in ASD (Meng et al., 2019; Zhang  
39 et al., 2023). Consequently, as a key capacity supporting social and self-related functions,

40 abnormalities in pain empathy may lead to social deficits as well as increased empathic distress  
41 in individuals with mental disorders (Di Girolamo et al., 2022; Thirioux et al., 2019). They may  
42 serve as common deficits across several mental disorders and promote functional impairments  
43 in daily life.

44 The neural basis of pain empathy has been extensively examined using functional  
45 magnetic resonance imaging (fMRI) in healthy individuals (Fallon et al., 2020; Labek et al.,  
46 2023; Lamm et al., 2011; Paradiso et al., 2021). Together with conceptual perspectives, these  
47 studies have outlined a core network that underlies pain-empathic processing including the  
48 anterior and middle cingulate cortex (ACC, MCC), middle and anterior insula cortex (MIC,  
49 AIC) as well as prefrontal and sensorimotor regions (Betti and Aglioti, 2016; Shackman et al.,  
50 2011; Timmers et al., 2018; Yao et al., 2016; Zhou et al., 2020b). Within this network, the  
51 cingulate and insula primarily extract the affective dimension of pain and interact with the  
52 subcortical, motor, and prefrontal regions to initiate adaptive responses (Dixon et al., 2017).

53 Pain empathy studies in healthy individuals and patient populations used fMRI in combination  
54 with different experimental paradigms and stimuli including e.g. visual stimuli presenting noxious  
55 stimulation of the limbs as well as painful facial expressions. The stimuli have been extensively  
56 characterized in previous studies in terms of the affective experience they induce using rating scales.  
57 A direct comparison of stimuli presenting noxious manipulation of limbs and painful facial  
58 expressions confirmed that both stimuli induce pain-empathic experiences and arousal (see e.g.  
59 (Zhou et al., 2020a)) and engage core brain systems of pain empathy, including the insula and  
60 anterior cingulate cortex (Jauniaux et al., 2019). However, stimuli presenting noxious stimulation  
61 of the limbs may provide more objective and clear indications of pain experienced by the other

62 person and may lead to a stronger experience of pain empathy and the engagement of inferior frontal  
63 brain regions involved in the encoding of sensory information, whereas painful facial expression  
64 may require a more subjective appraisal and may lead to a stronger engagement of medial prefrontal  
65 and temporal regions involved in social processes (Jauniaux et al., 2019; Zhou et al., 2020a; Zhou  
66 et al., 2016). Based on an increasing number of studies reporting pain-empathic deficits in  
67 mental disorders - which may encompass both, vicarious and appraisal-related components of  
68 empathy (Corbera et al., 2014; Meng et al., 2019; Zhang et al., 2023) - case-control studies  
69 combined pain empathy paradigms with fMRI to determine the underlying neurofunctional  
70 alterations in depression, SCH, or ASD (Fan et al., 2014; Fujino et al., 2014; Gu et al., 2015;  
71 Horan et al., 2016; Vistoli et al., 2017; Xu et al., 2020). However, these studies commonly  
72 compared a single group of patients with controls (but see ref. (Xu et al., 2020)) and findings  
73 with respect to robust neural alterations remained inconclusive. Several studies reported that  
74 the ACC, middle temporal gyrus (MTG), and inferior frontal gyrus (IFG) exhibit stronger pain  
75 empathic reactivity in patients (Gu et al., 2015; Hadjikhani et al., 2014; Horan et al., 2016;  
76 Ruetgen et al., 2021), while other studies reported no or opposite alterations (Fan et al., 2014;  
77 Xu et al., 2020). Moreover, results regarding the AIC - a region crucially involved in pain-  
78 empathic experience (Gu et al., 2012; Yao et al., 2016) - remained inconsistent, with several  
79 studies reporting intact AIC pain-empathic reactivity in the context of cerebellar alterations in  
80 mental disorders (Gu et al., 2015; Hadjikhani et al., 2014; Moriguchi et al., 2007).

81 The lack of convergent evidence for shared neural alterations may reflect disorder-specific  
82 neurofunctional empathy dysregulations or methodological limitations inherent to the  
83 conventional case-control neuroimaging approach, including (1) limited sample size, (2)

84 confinement to a single disorder, and (3) variations related to neuroimaging analysis methods  
85 (Müller et al., 2018; Specht, 2019; Zhou et al., 2022). Coordinate-based Meta-Analysis (CBMA)  
86 can help to overcome these limitations, including small sample sizes or the focus on a single  
87 disorder by pooling data from multiple studies, thus enhancing statistical power and  
88 generalizability. This method not only consolidates findings across diverse populations and  
89 imaging techniques but also identifies consistent brain activation and connectivity patterns,  
90 providing robust neural correlates for specific tasks or conditions. CBMA also explores  
91 variability between studies, and can thus help to identify inconsistencies and discrepancies  
92 (Klugah-Brown et al., 2024; Radua et al., 2012; Radua et al., 2013). Previous meta-analytic  
93 studies have successfully employed CBMA to determine common and separable  
94 neurofunctional alterations in mental disorders in cognitive, affective, and reward processing  
95 domains (e.g., (Bore et al., 2024; Ferraro et al., 2022; Klugah-Brown et al., 2020; McTeague et  
96 al., 2017; McTeague et al., 2020)), yet, pain empathic processing alterations across mental  
97 disorders have not been systematically explored.

98       Against this background, the present pre-registered meta-analysis capitalized on the growing  
99 number of original case-control fMRI studies on pain empathy and utilized a pre-registered meta-  
100 analytic strategy to determine brain regions that exhibit the most robust alterations during pain  
101 empathic processing across mental disorders. To further inform and guide the interpretation of  
102 the findings we included network-level and behavioral meta-analyses. The network-level  
103 analyses were conducted for the regions initially identified in the primary meta-analysis to  
104 determine which larger brain networks the identified regions functionally engage with.  
105 Behavioral meta-analyses were additionally employed to provide a behavioral characterization

106 of the identified regions in terms of behavioral domains that have most commonly been  
107 associated with these regions in the previous literature. Based on the previous literature, we  
108 hypothesized shared alterations in core regions of the pain empathic network (insula and ACC)  
109 and regions underlying social processing (e.g., regions in the temporal cortex) (Feng et al., 2021;  
110 Lamm et al., 2011; Zhou et al., 2020b).

## 111 **Methods**

### 112 *Literature Search*

113 The meta-analysis adhered to the Preferred Reporting Items for Systematic Reviews and  
114 Meta-Analyses (PRISMA) guidelines (**Figure 1**) (Page et al., 2021) and was preregistered on  
115 the Open Science Framework platform (<https://osf.io/axt9k/>). Literature search identified  
116 original case-control fMRI studies examining neural activation during pain-empathic  
117 processing (in response to stimuli showing noxious manipulation to limbs or painful facial  
118 expressions, for shared neural and behavioral effects see ref. (Zhou et al., 2020b)) in mental  
119 disorders according to the Diagnostic and Statistical Manual of Mental Disorders (Version 5,  
120 DSM-5). The search utilized three databases: PubMed, Web of Science, and Scopus. The search  
121 period included the period until May 2024.

122 The search strategies, initially designed for PubMed, combine MeSH (Medical Subject  
123 Headings) terms and keywords and were subsequently adapted and utilized with the other two  
124 databases (main focus was on pain empathy, functional magnetic resonance imaging, mental  
125 disorders; detailed terms, see **Supplement 1**). According to DSM-V criteria, individuals with  
126 mental disorders including MDD, SCH, ASD, alexithymia, and CD experience abnormalities

127 in pain empathy causing social deficits as well as empathic distress. Alexithymia is a pathology-  
128 relevant personality trait characterized by difficulties in recognizing, expressing, and describing  
129 one's own emotional experiences. Elevated levels of alexithymia represent a common symptom  
130 in many psychiatric conditions, including depression and anxiety disorders. In the context of  
131 long-standing discussions on the role of alexithymia in pain-empathic alterations, we here  
132 included studies in individuals with high levels of alexithymia (see refs. (Brewer et al., 2015;  
133 Li et al., 2019)). In addition, we screened published reviews and meta-analyses on related topics  
134 to identify further relevant literature.

135 Two independent reviewers (JX.H. and M.C.B.) assessed inclusion criteria, and conflicts  
136 were resolved by a third reviewer (B.B.). Full-context articles were reviewed by two  
137 independent reviewers (JX.H. and M.C.B.). Data extraction was performed by two reviewers  
138 and conflicts and errors in data extraction were resolved by a third reviewer (B.B.).

### 139 *Inclusion and Exclusion Criteria*

140 The initial exclusion of existing articles, including duplicates and non-articles, was first  
141 performed using Endnote software (X9 version; <https://endnote.com/>). We next carefully screened  
142 the literature according to standardized criteria and guidelines (**Figure 1**). The following  
143 inclusion criteria were applied: (1) studies using a pain empathy task (presenting stimuli  
144 depicting painful face expression or body pain to the participants); (2) studies acquiring and  
145 analyzing whole brain data acquisition (excluding regions of interest [ROI] results); (3) original  
146 studies utilizing a case-control design comparing brain activity in patients and healthy  
147 individuals; (4) activation contrasts generated by the subtractive approach reflecting differences  
148 between patients and controls during the processing of pain empathy; (5) differences in terms



149 of peak brain activation coordinates reported; (6) results reported in standard stereotactic  
150 coordinates (either Talairach or Montreal Neurological Institute [MNI] space), and (7) article  
151 written in English.

152 Additional exclusion criteria were as follows: (1) studies in pediatric samples; (2) studies  
153 reporting results without exact peak coordinates; (3) studies that focus on other empathy  
154 domains such as affective or cognitive empathy; (4) studies reporting results in patients or  
155 healthy subjects only; (5) studies reporting findings from datasets from previous (already  
156 included) studies.

### 157 *Voxel-Wise Meta-Analysis*

158 The meta-analysis was performed using Seed-based d Mapping Permutation of Subject  
159 Images (SDM-PSI) (version 6.22, <https://www.sdmproject.com>). SDM combines recent  
160 advances and features of previous methods, such as activation likelihood estimate (ALE) and  
161 multilevel kernel density analysis (MKDA), and permits more detailed and accurate meta-  
162 analyses (Radua and Mataix-Cols, 2018; Radua et al., 2012). SDM-PSI is based on the  
163 MetaNSUE algorithm using unbiased maximum likelihood estimation (MLE) to build whole-  
164 brain effect size and variance maps, while taking into account additions and subtractions of  
165 measurements (e.g., activation and de-activation) that allow conflicting results to cancel each  
166 other out. The procedure moreover takes into account irregular local spatial covariances of  
167 different brain tissues. Meanwhile, SDM-PSI uses a leave-one-out jackknife procedure,  
168 weighting the calculation of within-study variance (i.e., studies with larger sample sizes and/or  
169 lower errors contribute more) and between-study heterogeneity, to prevent a single study or few  
170 studies from driving the results. Although image-based meta-analysis can offer more precise

171 results, the scarcity of original studies and authors providing original t-maps limits its practical  
172 application (Liu et al., 2022; Salimi-Khorshidi et al., 2009). For pooling of data with SDM-PSI,  
173 the coordinates in standard spaces and their respective  $t$ -values are collected. An anisotropic  
174 Gaussian kernel with a full-width at half maximum (FWHM) of  $20mm$  and a voxel size of  $2mm$   
175 was used (Albajes-Eizagirre et al., 2019). To balance type I and type II errors when determining  
176 neurofunctional brain alterations in mental disorders results were thresholded at  $p < 0.0025$ ,  
177 uncorrected;  $k > 10$  (in line with (Bore et al., 2023; Chavanne and Robinson, 2021)) (Radua et  
178 al., 2012). Given that mental disorders have different onset and peak ages (Solmi et al., 2021)  
179 and neurodevelopmental changes have been reported in the domain of pain empathy (Decety  
180 and Michalska, 2010), age was included as a covariate (in line with (Gong et al., 2020)), to  
181 further account for a potential impact of the variations in age between the samples in the  
182 included studies we employed an independent sample t-test by SPSS to the standard deviations  
183 for age reported in the original studies. Results did not confirm significant differences in the  
184 age variations between patients and controls ( $df = 20$ ,  $t$ -value = 0.13,  $p = 0.686$ ). Visualization  
185 of brain activation was performed using MRICroGL (version 1.2.20,  
186 <https://www.nitrc.org/projects/mricrogl>).

### 187 ***Heterogeneity and Bias Testing***

188 Heterogeneity in the present study was assessed using the  $I^2$  index, with  $I^2$  values of 25%,  
189 50%, and 75% representing low, moderate, and high heterogeneity respectively (Higgins, 2002).  
190 Tests were carried out to check for publication bias. Egger's test was used to assess funnel plot  
191 asymmetry, with a  $p$ -value less than 0.05 indicating significant publication bias (Egger et al.,  
192 1997).

### 193 ***Functional Characterization of the Identified Regions at the Network and Behavioral Level***

194 To investigate the brain networks associated with the identified regions, peak coordinates  
195 of the identified regions were entered into the Neurosynth database  
196 (<https://www.neurosynth.org>) to obtain non-thresholded resting-state functional connectivity  
197 maps (rs-FC maps) and meta-analytic co-activation maps of the relevant brain regions.  
198 Subsequently, we employed SPM12 (Wellcome Department of Imaging Neuroscience, London,  
199 UK) to apply a threshold of  $r > 0.2$  to the rs-FC maps and convert the thresholded maps into  $Z$ -  
200 scores. Finally, we merged the rs-FC thresholded maps with the meta-analytic co-activation  
201 maps to generate conjunction maps of the relevant regions of interest. Next, we employed the  
202 Anatomy toolbox to extract the labels of the conjunction maps (Eickhoff et al., 2005).

203 For further behavioral characterization of the identified regions, we implemented meta-  
204 analytic behavioral profiling using the Brain Annotation Toolbox (BAT) in combination with  
205 AAL2 (Automated Anatomical Labeling, atlas). To this end, the peak coordinates of the  
206 identified regions were examined and the top 15 behavioral items and  $p$ -values were obtained  
207 (in descending order of  $p$ -values) (Liu et al., 2019).

### 208 ***Meta-Regression Analyses***

209 Meta-regression analysis was employed to assess the effect of subject characteristics on  
210 the obtained results, including gender, age, and treatment. Significant findings suggest that  
211 certain variables are related to the observed heterogeneity, indicating the potential influence of  
212 unaccounted factors or confounding variables.

### 213 **Results**

## 214 *Characteristics of the Included Studies*

215 Based on the standardized criteria and guidelines, we finally included 11 studies from 525  
216 individuals (Decety et al., 2009; Fan et al., 2014; Fujino et al., 2014; Gu et al., 2015; Hadjikhani et  
217 al., 2014; Horan et al., 2016; Lockwood et al., 2013; Moriguchi et al., 2007; Ruetgen et al., 2021;  
218 Vistoli et al., 2017; Xu et al., 2020), 296 patients and 229 controls, mean age  $28.2 \pm 9.1$  years,  
219 and one on conduct disorder (CD), two on alexithymia, two on SCH, three on ASD, and three  
220 on major depressive disorder (MDD) (details in **Table 1**). We exported 143 peak coordinates  
221 on pain empathy differences between the comparisons of patient and control group, including  
222 8 physical pain empathy paradigms, and 3 affective pain empathy (face expression) paradigms  
223 (details in **Table 2**).

## 224 *Shared Pain Empathy Alterations across Mental Disorders*

225 The primary meta-analysis revealed that patients with mental disorders exhibited increased  
226 pain empathic activation in a cluster located in the left ACC ( $x/y/z = 0/48/0$ ,  $p < 0.0025$ ) and  
227 spreading into the medial prefrontal cortex (mPFC) and a second cluster located in the right  
228 MTG ( $x/y/z = 60/-14/-12$ ,  $p < 0.0025$ ) in comparison with controls (**Table 3, Figure 2A**).  
229 Reduced activation in the patients relative to controls was observed in the left cerebellum IV/V  
230 (CE\_4/5,  $x/y/z = -22/-48/-28$ ,  $p < 0.0025$ ) and the left middle occipital gyrus (MOG,  $x/y/z = -$   
231  $52/-70/2$ ,  $p < 0.0025$ ) (**Table 3, Figure 2B**). Heterogeneity test results were all below 25%,  
232 indicating low heterogeneity across studies. Additionally, the results of Egger's test revealed  $p$ -  
233 values greater than 0.05, suggesting that the included studies did not demonstrate evidence of  
234 a publication bias (**Table 3**).

235 *Network-Level Functional Characterization via Neurosynth*

236 The identified ACC region showed strong and overlapping co-activation and connectivity  
237 patterns with cortical midline regions including ACC, medial and orbitofrontal regions as well  
238 as the posterior cingulate (PCC) and precuneus (**Figure 3A**). The identified MTG region  
239 exhibited overlapping co-activation and connectivity patterns with bilateral middle temporal  
240 and (inferior) parietal regions as well as with cortical midline regions, i.e., medial  
241 prefrontal/cingulate regions and PCC and precuneus (**Figure 3B**). Examining the overlap  
242 between both networks revealed that both regions exhibited functional interactions with the  
243 cortical midline regions, including the orbitofrontal and medial PFC as well as posterior parietal  
244 regions (angular gyrus, PCC, precuneus, **Figure 3C**).

245 Examination of the connectivity and co-activation maps of the regions exhibiting  
246 decreased pain empathic reactivity in mental disorders (cerebellum, MOG) revealed separable  
247 networks. The cerebellum region exhibited regional-restricted bilateral connectivity with other  
248 (anterior) cerebellar regions (**Figure 3D**), while the MOG exhibited interactions with a bilateral  
249 network encompassing lateral occipital regions, and precentral and postcentral regions (**Figure**  
250 **3E**).

251 *Behavioral Characterization of the Identified Regions*

252 Meta-analytic behavioral characterization indicated that the left ACC and right MTG are  
253 associated with negative affective (stress, depression, fear) and evaluative (self-referential,  
254 reward) processes or social cognitive (theory of mind, social) processes, respectively (**Figure**  
255 **4A, B**). In contrast, the left CE 4/5 and left MOG were found to be associated with motor and  
256 visuospatial processes (**Figure 4C, D**). Please note that smaller  $p$ -values indicate a higher

257 degree of correlation with the relevant brain regions.

### 258 *Meta-Regression Analyses: Gender, Age, and Treatment*

259 Meta-regression analysis in SDM revealed no significant effects of gender, age, or  
260 medication on altered activity in the four meta-analytically identified brain regions.

### 261 **Discussion**

262 We capitalized on pre-registered neuroimaging meta-analyses to determine whether pain-  
263 empathic dysregulations share a common neurobiological substrate across mental disorders. To  
264 guide interpretation, the primary analyses were flanked by meta-analytic network-level and  
265 behavioral profiling of the identified regions. Quantitative analysis of eleven case-control fMRI  
266 studies with data from 296 patients and 229 controls revealed that individuals with mental  
267 disorders exhibited increased pain empathic reactivity in the left ventral ACC and adjacent  
268 mPFC, as well as in the contralateral MTG. Conversely, patients with mental disorders showed  
269 hyporeactivity in the left anterior cerebellum and MOG. Network-level decoding analyses  
270 further indicated that the hyperactive regions show a strong and convergent network-level  
271 interaction with cortical midline regions that together constitute the core default mode network  
272 (DMN) and were behaviorally characterized by stress, negative affect, and social cognition-  
273 related terms. In contrast, the hypoactive regions exhibited distinct and regional-specific  
274 connectivity profiles with the anterior cerebellum or occipital and sensory-motor regions,  
275 respectively. With reference to our hypotheses, these findings underscore that shared neural  
276 dysregulations in the ACC and MTG may underlie pain-empathic alterations across mental  
277 disorders. In contrast to our hypothesis, no alterations in the insular cortex were observed, while

278 the anterior cerebellum and MOG showed convergent hyporeactivity.

### 279 ***Shared Pain Empathic Neural Reactivity across Mental Disorders***

280 Animal models suggest that the ACC plays a critical role in both, the experience and  
281 regulation of first-hand experience of pain and negative affective states as well as social  
282 transmission of pain and distress (see refs. (Carrillo et al., 2019; Li et al., 2021; Smith et al.,  
283 2021)). It represents the core module for the affective-motivational component of the "pain  
284 matrix" activated by various painful stimuli (Duerden and Albanese, 2013) and plays an  
285 important role in the transition from acute to chronic pain (Bliss et al., 2016; Kuner and Kuner,  
286 2021; Li et al., 2023). In human imaging studies, the ACC and insula have been consistently  
287 determined as core regions of the pain empathic network, yet most meta-analyses identified a  
288 more dorsal part of the ACC (see ref. (Lamm et al., 2011)). In contrast to the dorsal part of the  
289 ACC, the ventral ACC (vACC) has been strongly involved in evaluating the emotional salience  
290 of a situation and to adaptively regulate the emotional experience (see refs. (Etkin et al., 2011a;  
291 Xiang et al., 2018)). Hyperactivity in this region may thus reflect a stronger distress-related  
292 pain-empathic reactivity or a stronger need to regulate the negative affective experience (Betti  
293 and Aglioti, 2016; Nabulsi et al., 2022). An increasing number of reports indicated that  
294 individuals with mental disorders experience greater levels of empathic distress (Allman et al.,  
295 2001; Apps et al., 2016) and the role of this region in the experience of pain-related emotional  
296 distress may reflect higher pain empathic reactivity in individuals with mental disorders. The  
297 vACC subregion of the ACC has moreover been found to play an important role in other related  
298 functions such as social cognitive decision-making, behavior encoding, and outcome prediction  
299 (Brown and Morey, 2012; Lockwood and Wittmann, 2018) and can mediate the saliency of the

300 external stimuli thus triggering pain empathic experiences (Lamm et al., 2016).

301 Further mapping the location of the significant peak coordinates with the Juelich Brain  
302 atlas revealed that the ACC cluster was located specifically in the pregenual subdivision  
303 (pgACC). The pgACC has been associated with several functions that support pain empathic  
304 processing, including pain empathic reactivity and habituation (Preis et al., 2015), compassion  
305 (Klimecki et al., 2014) and implicit emotion regulation (Etkin et al., 2010). The cluster extended  
306 into the mPFC, an integral component of the DMN, a network critically engaged in several  
307 functions supporting pain empathy, i.e., socio-affective processes such as self-reference, social  
308 cognition, and contextual integration (see refs. (Menon, 2023; Yeshurun et al., 2021)).

309 The ACC cluster also encompassed regions of the mPFC, a region with strong anatomical  
310 and functional connections with a wide range of subcortical brain regions (Ong et al., 2019).  
311 Both animal and human studies have underscored the significance of the ACC and the mPFC  
312 in emotional cognitive processing, social-emotional cognition (e.g., attachment, empathy, pro-  
313 social behavior), emotion regulation, decision-making, and pain (Etkin et al., 2011b; Jahn et al.,  
314 2016; Klein-Flügge et al., 2022; Malezieux et al., 2023; Murray and Fellows, 2021; Zhou et al.,  
315 2019; Zhuang et al., 2021). The convergent dysfunction affecting both of these systems aligns  
316 with the additional functional requirements of pain empathy, which, compared to the experience  
317 of direct pain require complex social-emotional computations to determine the experience of  
318 the other person and the integration of previous knowledge and contextual information (Betti  
319 and Aglioti, 2016; Danziger et al., 2009). In line with this suggestion, previous studies reported  
320 that structural damage or aberrant functional changes in the ACC or mPFC can severely impair  
321 social behavior as well as adaptive emotion regulation in animals (Bissière et al., 2008; Bliss-



322 Moreau et al., 2021; Chudasama et al., 2013; Kaefer et al., 2020; Ohta et al., 2020).

323 In addition to the ACC/mPFC, the MTG exhibited consistently elevated pain empathic  
324 reactivity across mental disorders. The MTG has been convergently involved in social-  
325 cognitive functions that may support the pain-empathic process, including inferring and  
326 understanding the psychological states of others (Theory of Mind, ToM, (Preckel et al., 2018;  
327 Schurz et al., 2017; Vucurovic et al., 2023)), contextual and sensory information integration  
328 (Xu et al., 2019), as well as pain perception and pain empathy (Kucyi and Davis, 2015; Maliske  
329 et al., 2023). In this context, a stronger MTG recruitment may reflect an impaired ability to  
330 distinguish own and others' distressing states (Hoffmann et al., 2016; Preckel et al., 2018),  
331 leading to an impaired ability to detach from the pain-empathic situation and in turn  
332 compromised social cognition (Sprooten et al., 2017; Zhang et al., 2016).

333 Although the exact functional interaction between the MTG and the mPFC during pain  
334 empathic processing remains to be determined both regions form integral core components of the  
335 DMN which supports large scale functional interaction between these regions during pain empathy  
336 processes. The MTG modulates attentional resources to pain cues (Ballotta et al., 2018; Lee et al.,  
337 2021; Marek and Dosenbach, 2018) and can contribute to the integration and regulation of pain  
338 sensation and pain emotion together with the ACC in pain processing (Ou et al., 2024).”

339 Abnormal pain empathy has been associated to further impairments in mental disorders.  
340 Dysregulations in pain empathy may lead to hyperlinking of painful stimuli to related  
341 experiences in individuals with mental disorders (Fitzgibbon et al., 2010), difficulty in shifting  
342 attention (Li et al., 2020), inability to correctly differentiate between feelings of self and others  
343 (Preckel et al., 2018), and can increase the experience of distress while reducing the inhibition

344 of negative emotions (Rütgen et al., 2015; Thirioux et al., 2019).

345 Together, the pattern of hyperactivation of the ACC, mPFC, and MTG in patients with  
346 mental disorders and a convergent coupling of these regions with the DMN may reflect that  
347 excessive pain empathic distress responses and a failure to regulate these in the context of social  
348 processing dysfunctions may constitute a shared dysregulation mediating pain empathic deficits.

### 349 *Abnormal Sensorimotor Functioning in Pain Empathy in Individuals with Mental Disorders*

350 The cerebellum and MOG displayed decreased activity to pain empathic engagement  
351 across disorders. In line with our meta-analytic behavioral decoding, numerous previous studies  
352 have involved these regions in sensory and motor processes. The cerebellum is anatomically  
353 connected to the somatosensory cortex and has a similar topographic map of the body, which  
354 is considered to play a crucial role in somatosensory function and motor control (Opie et al.,  
355 2022; Wiestler et al., 2011). While we did not hypothesize alterations in these regions, some  
356 previous studies reported neurofunctional pain empathic alterations in these regions in autism  
357 spectrum disorders and attention deficit hyperactivity disorder (ADHD) indicating  
358 abnormalities in cerebellar organization and impaired motor executive control (Betti and Aglioti,  
359 2016; Clark et al., 2021). The MOG is considered an important brain area for visual stimulus feature  
360 extraction and recognition, as well as body part perception (Thiebaut de Schotten et al., 2014), and  
361 reduced activation of the MOG in patients with MDD and ASD has previously been interpreted  
362 to reflect impaired visual information processing abilities (Matsuoka et al., 2020; Teng et al.,  
363 2018). Together with an early study suggesting that pain empathy-related cerebellar activation  
364 may be related to sensory-motor representation and contribute to cognitive understanding of  
365 promoting pain empathy (Strick et al., 2009), these results may reflect early sensory-motor

366 processing dysfunction in the patients. These patients may have abnormal perception and  
367 processing of pain empathic stimuli which may lead to a failure to accurately perceive and react  
368 to social information.

369 The present meta-analytic study focuses on abnormal activation patterns shared by pain  
370 empathy induced by the included paradigms in mental disorders, and included paradigms with  
371 spatial similarities in brain activation in other neuroscience studies, such as activation of the  
372 MTG, mPFC, ACC, and other relevant brain regions in Zhou et al.'s study on alternative pain  
373 (Zhou et al., 2020b); Jauniaux et al. 's meta-analytic study on pain empathy yielded similar  
374 results for ACC activation (Jauniaux et al., 2019). Differences in pain empathy, such as  
375 empathic pain responses to different pain empathy stimuli and their specific brain activation  
376 patterns, could be further explored in the future.

### 377 ***Limitations***

378 The study has limitations that should be considered. Firstly, the number of studies on pain  
379 empathic processing using fMRI in patients with mental disorders in pain empathy was  
380 moderate, meta-analyses depend on the selection and quality of the original studies. Several of  
381 the studies included in the present meta-analyses incorporated comparably small sample sizes  
382 which may in turn limit the statistical testing power of the meta-analyses (Cremers et al., 2017).  
383 While the approach to assign weights based on single studies with the sample size towards each  
384 study in SDM may – to a certain extent - account for a bias towards findings based on small  
385 sample sizes the results of the present meta-analyses need to be interpreted cautiously and the  
386 robustness of the findings remain to be re-evaluated with the accumulation of a larger number

387 of original studies. Secondly, the number of studies did not allow to employ sub-group analyses,  
388 e.g., with respect to larger symptomatic groups such as internalizing or externalizing disorders  
389 which have shown differential neural signatures (see ref. (Yu et al., 2023)).

### 390 ***Conclusion***

391 The present study suggests that pain-empathic alterations across disorders are neurally  
392 underpinned by increased vACC/mPFC and MTG reactivity and decreased cerebellum and  
393 MOG reactivity in patients with mental disorders. This pattern may reflect dysregulated  
394 affective responses and social deficits that are further reflected in strong network-level  
395 interactions of these regions with the DMN. Targeting pain-empathic dysfunctions in mental  
396 disorders with tailored behavioral interventions or via brain modulation techniques that can  
397 enhance pain empathy (Geng et al., 2018; Yao et al., 2016) may lead to beneficial effects on  
398 social cognitive deficits in mental disorders.

## Acknowledgment

### Author contributions

*Concept and design:* Jingxian He, Benjamin Becker.

*Acquisition, analysis, or interpretation of data:* Jingxian He, Mercy Chepngetich Bore, Heng Jiang,

Xianyang Gan, Junjie Wang; Jialin Li, Xiaolei Xu, Lan Wang, Kun Fu, Benjamin Becker.

*Drafting of the manuscript:* Jingxian He, Benjamin Becker.

*Critical review of the manuscript for important intellectual content:* Mercy Chepngetich Bore, Heng

Jiang, Xianyang Gan, Keith Maurice Kendrick, Benjamin Becker.

*Statistical analysis:* Jingxian He, Mercy Chepngetich Bore.

*Administrative, technical, or material support:* Mercy Chepngetich Bore, Xianyang Gan, Jialin Li,

Xiaolei Xu, Liyuan Li, Bo Zhou, Keith Maurice Kendrick.

*Supervision:* Benjamin Becker.

We would also like to thank Dr. Zhenjiang Li from the University of Chinese Academy of Sciences, for his assistance and insights into the manuscript.

### Conflict of Interest

The authors report no conflicts of interest.

**Funding/Support:** This work was supported by the National Natural Science Foundation of China (Grants No. 82271583, 32250610208), China MOST2030 Brain Project (Grant No. 2022ZD0208500), and a start-up grant from The University of Hong Kong.

**Role of the Funder/Sponsor:** The funders had no role in the design and conduct of the study; collection, management, analysis, and interpretation of the data; preparation, review, or approval of the manuscript; and decision to submit the manuscript for publication. Any opinions, findings, conclusions, or recommendations expressed in this publication do not reflect the views of the Government of the Hong Kong Special Administrative Region or the Innovation and Technology Commission.

**Data Sharing Statement:** See Supplement 2

## Disclosures

The authors report no conflicts of interest.

## Reference:

- Albajes-Eizagirre, A., Solanes, A., Vieta, E., Radua, J., 2019. Voxel-based meta-analysis via permutation of subject images (PSI): Theory and implementation for SDM. *NeuroImage* 186, 174-184.
- Allman, J.M., Hakeem, A., Erwin, J.M., Nimchinsky, E., Hof, P., 2001. The anterior cingulate cortex. The evolution of an interface between emotion and cognition. *Annals of the New York Academy of Sciences* 935, 107-117.
- Apps, Matthew A.J., Rushworth, Matthew F.S., Chang, Steve W.C., 2016. The Anterior Cingulate Gyrus and Social Cognition: Tracking the Motivation of Others. *Neuron* 90, 692-707.
- Bailey, P.E., Henry, J.D., Von Hippel, W., 2008. Empathy and social functioning in late adulthood. *Aging & Mental Health* 12, 499-503.
- Ballotta, D., Lui, F., Porro, C.A., Nichelli, P.F., Benuzzi, F., 2018. Modulation of neural circuits underlying temporal production by facial expressions of pain. *PLoS one* 13, e0193100.
- Betti, V., Aglioti, S.M., 2016. Dynamic construction of the neural networks underpinning empathy for pain. *Neuroscience & Biobehavioral Reviews* 63, 191-206.
- Bissière, S., Plachta, N., Hoyer, D., McAllister, K.H., Olpe, H.-R., Grace, A.A., Cryan, J.F., 2008. The Rostral Anterior Cingulate Cortex Modulates the Efficiency of Amygdala-Dependent Fear Learning. *Biological psychiatry* 63, 821-831.
- Bliss-Moreau, E., Santistevan, A.C., Bennett, J., Moadab, G., Amaral, D.G., 2021. Anterior Cingulate Cortex Ablation Disrupts Affective Vigor and Vigilance. *The Journal of Neuroscience* 41, 8075-8087.
- Bliss, T.V., Collingridge, G.L., Kaang, B.K., Zhuo, M., 2016. Synaptic plasticity in the anterior cingulate cortex in acute and chronic pain. *Nature reviews. Neuroscience* 17, 485-496.
- Bore, M.C., Liu, X., Gan, X., Wang, L., Xu, T., Ferraro, S., Li, L., Zhou, B., Zhang, J., Vatansever, D., Biswal, B., Klugah-Brown, B., Becker, B., 2023. Distinct neurofunctional alterations during motivational and hedonic processing of natural and monetary rewards in depression - a neuroimaging meta-analysis. *Psychological medicine*, 1-13.
- Bore, M.C., Liu, X., Gan, X., Wang, L., Xu, T., Ferraro, S., Li, L., Zhou, B., Zhang, J., Vatansever, D., Biswal, B., Klugah-Brown, B., Becker, B., 2024. Distinct neurofunctional alterations during motivational and hedonic processing of natural and monetary rewards in depression - a neuroimaging meta-analysis. *Psychological medicine* 54, 639-651.
- Brewer, R., Happé, F., Cook, R., Bird, G., 2015. Commentary on "Autism, oxytocin and interoception": Alexithymia, not Autism Spectrum Disorders, is the consequence of interoceptive failure. *Neuroscience and biobehavioral reviews* 56, 348-353.
- Brown, V.M., Morey, R.A., 2012. Neural Systems for Cognitive and Emotional Processing in Posttraumatic Stress Disorder. *Frontiers in psychology* 3.
- Carrillo, M., Han, Y., Migliorati, F., Liu, M., Gazzola, V., Keysers, C., 2019. Emotional Mirror Neurons in the Rat's Anterior Cingulate Cortex. *Current biology : CB* 29, 1301-1312.e1306.
- Chavanne, A.V., Robinson, O.J., 2021. The Overlapping Neurobiology of Induced and Pathological Anxiety: A Meta-Analysis of Functional Neural Activation. *The American journal of psychiatry* 178, 156-164.
- Chudasama, Y., Daniels, T.E., Gorrin, D.P., Rhodes, S.E.V., Rudebeck, P.H., Murray, E.A., 2013. The Role of the Anterior Cingulate Cortex in Choices based on Reward Value and Reward Contingency. *Cerebral Cortex* 23, 2884-2898.



- Clark, S.V., Semmel, E.S., Aleksonis, H.A., Steinberg, S.N., King, T.Z., 2021. Cerebellar-Subcortical-Cortical Systems as Modulators of Cognitive Functions. *Neuropsychology review* 31, 422-446.
- Corbera, S., Ikezawa, S., Bell, M.D., Wexler, B.E., 2014. Physiological evidence of a deficit to enhance the empathic response in schizophrenia. *European psychiatry : the journal of the Association of European Psychiatrists* 29, 463-472.
- Cuthbert, B.N., 2014. The RDoC framework: facilitating transition from ICD/DSM to dimensional approaches that integrate neuroscience and psychopathology. *World psychiatry : official journal of the World Psychiatric Association (WPA)* 13, 28-35.
- Danziger, N., Faillenot, I., Peyron, R., 2009. Can We Share a Pain We Never Felt? Neural Correlates of Empathy in Patients with Congenital Insensitivity to Pain. *Neuron* 61, 203-212.
- Decety, J., Michalska, K.J., 2010. Neurodevelopmental changes in the circuits underlying empathy and sympathy from childhood to adulthood. *Developmental science* 13, 886-899.
- Decety, J., Michalska, K.J., Akitsuki, Y., Lahey, B.B., 2009. Atypical empathic responses in adolescents with aggressive conduct disorder: A functional MRI investigation. *Biological psychology* 80, 203-211.
- Di Girolamo, M., Giromini, L., Bosi, J., Warmelink, L., La Scala, I., Loiacono, C., Miraglia, F., Zennaro, A., 2022. The Role Played by Theory of Mind and Empathy in the Feigning of Psychopathology. *International Journal of Forensic Mental Health* 21, 334-347.
- Dixon, M.L., Thiruchselvam, R., Todd, R., Christoff, K., 2017. Emotion and the prefrontal cortex: An integrative review. *Psychological bulletin* 143, 1033-1081.
- Duerden, E.G., Albanese, M.C., 2013. Localization of pain-related brain activation: a meta-analysis of neuroimaging data. *Human brain mapping* 34, 109-149.
- Egger, M., Davey Smith, G., Schneider, M., Minder, C., 1997. Bias in meta-analysis detected by a simple, graphical test. *BMJ (Clinical research ed.)* 315, 629-634.
- Eickhoff, S.B., Stephan, K.E., Mohlberg, H., Grefkes, C., Fink, G.R., Amunts, K., Zilles, K., 2005. A new SPM toolbox for combining probabilistic cytoarchitectonic maps and functional imaging data. *NeuroImage* 25, 1325-1335.
- Etkin, A., Egner, T., Kalisch, R., 2011a. Emotional processing in anterior cingulate and medial prefrontal cortex. *Trends in cognitive sciences* 15, 85-93.
- Etkin, A., Egner, T., Kalisch, R., 2011b. Emotional processing in anterior cingulate and medial prefrontal cortex. *Trends in cognitive sciences* 15, 85-93.
- Etkin, A., Prater, K.E., Hoeft, F., Menon, V., Schatzberg, A.F., 2010. Failure of anterior cingulate activation and connectivity with the amygdala during implicit regulation of emotional processing in generalized anxiety disorder. *The American journal of psychiatry* 167, 545-554.
- Fallon, N., Roberts, C., Stancak, A., 2020. Shared and distinct functional networks for empathy and pain processing: a systematic review and meta-analysis of fMRI studies. *Social cognitive and affective neuroscience* 15, 709-723.
- Fan, Y.-T., Chen, C., Chen, S.-C., Decety, J., Cheng, Y., 2014. Empathic arousal and social understanding in individuals with autism: evidence from fMRI and ERP measurements. *Social cognitive and affective neuroscience* 9, 1203-1213.
- Feng, C., Eickhoff, S.B., Li, T., Wang, L., Becker, B., Camilleri, J.A., Héту, S., Luo, Y., 2021. Common brain networks underlying human social interactions: Evidence from large-scale neuroimaging meta-analysis. *Neuroscience and biobehavioral reviews* 126, 289-303.
- Ferraro, S., Klugah-Brown, B., Tench, C.R., Yao, S., Nigri, A., Demichelis, G., Pinardi, C., Bruzzone,

- M.G., Becker, B., 2022. Dysregulated anterior insula reactivity as robust functional biomarker for chronic pain—Meta-analytic evidence from neuroimaging studies. *Human brain mapping* 43, 998–1010.
- Fitzgibbon, B.M., Giummarra, M.J., Georgiou-Karistianis, N., Enticott, P.G., Bradshaw, J.L., 2010. Shared pain: From empathy to synaesthesia. *Neuroscience & Biobehavioral Reviews* 34, 500–512.
- Fujino, J., Yamasaki, N., Miyata, J., Kawada, R., Sasaki, H., Matsukawa, N., Takemura, A., Ono, M., Tei, S., Takahashi, H., Aso, T., Fukuyama, H., Murai, T., 2014. Altered brain response to others' pain in major depressive disorder. *Journal of affective disorders* 165, 170–175.
- Geng, Y., Zhao, W., Zhou, F., Ma, X., Yao, S., Hurlemann, R., Becker, B., Kendrick, K.M., 2018. Oxytocin Enhancement of Emotional Empathy: Generalization Across Cultures and Effects on Amygdala Activity. *Frontiers in neuroscience* 12, 512.
- Gong, J., Wang, J., Qiu, S., Chen, P., Luo, Z., Wang, J., Huang, L., Wang, Y., 2020. Common and distinct patterns of intrinsic brain activity alterations in major depression and bipolar disorder: voxel-based meta-analysis. *Translational psychiatry* 10.
- Gu, X., Eilam-Stock, T., Zhou, T., Anagnostou, E., Kolevzon, A., Soorya, L., Hof, P.R., Friston, K.J., Fan, J., 2015. Autonomic and brain responses associated with empathy deficits in autism spectrum disorder. *Human brain mapping* 36, 3323–3338.
- Gu, X., Gao, Z., Wang, X., Liu, X., Knight, R.T., Hof, P.R., Fan, J., 2012. Anterior insular cortex is necessary for empathetic pain perception. *Brain : a journal of neurology* 135, 2726–2735.
- Guhn, A., Merkel, L., Hübner, L., Dziobek, I., Sterzer, P., Köhler, S., 2020. Understanding versus feeling the emotions of others: How persistent and recurrent depression affect empathy. *Journal of psychiatric research* 130, 120–127.
- Hadjikhani, N., Zürcher, N.R., Rogier, O., Hippolyte, L., Lemonnier, E., Ruest, T., Ward, N., Lassalle, A., Gillberg, N., Billstedt, E., Helles, A., Gillberg, C., Solomon, P., Prkachin, K.M., Gillberg, C., 2014. Emotional contagion for pain is intact in autism spectrum disorders. *Translational psychiatry* 4.
- Hartmann, H., Forbes, P.A.G., Rütgen, M., Lamm, C., 2022. Placebo Analgesia Reduces Costly Prosocial Helping to Lower Another Person's Pain. *Psychological Science* 33, 1867–1881.
- Henry, J.D., Bailey, P.E., Rendell, P.G., 2008. Empathy, social functioning and schizotypy. *Psychiatry research* 160, 15–22.
- Higgins, J.P.T., 2002. Measuring inconsistency in meta-analyses. *BMJ (Clinical research ed.)*, 327–557.
- Hoffmann, F., Banzhaf, C., Kanske, P., Gärtner, M., Bermpohl, F., Singer, T., 2016. Empathy in depression: Egocentric and altercentric biases and the role of alexithymia. *Journal of affective disorders* 199, 23–29.
- Horan, W.P., Jimenez, A.M., Lee, J., Wynn, J.K., Eisenberger, N.I., Green, M.F., 2016. Pain empathy in schizophrenia: an fMRI study. *Social cognitive and affective neuroscience* 11, 783–792.
- Jahn, A., Nee, D.E., Alexander, W.H., Brown, J.W., 2016. Distinct Regions within Medial Prefrontal Cortex Process Pain and Cognition. *The Journal of Neuroscience* 36, 12385–12392.
- Jauniaux, J., Khatibi, A., Rainville, P., Jackson, P.L., 2019. A meta-analysis of neuroimaging studies on pain empathy: investigating the role of visual information and observers' perspective. *Social cognitive and affective neuroscience* 14, 789–813.
- Kaefer, K., Nardin, M., Blahna, K., Csicsvari, J., 2020. Replay of Behavioral Sequences in the Medial Prefrontal Cortex during Rule Switching. *Neuron* 106, 154–165.e156.
- Karos, K., Meulders, A., Goubert, L., Vlaeyen, J.W.S., 2020. Hide Your Pain: Social Threat Increases

Pain Reports and Aggression, but Reduces Facial Pain Expression and Empathy. *The journal of pain* 21, 334-346.

Kennedy, D.P., Adolphs, R., 2012. The social brain in psychiatric and neurological disorders. *Trends in cognitive sciences* 16, 559-572.

Klein-Flügge, M.C., Bongioanni, A., Rushworth, M.F.S., 2022. Medial and orbital frontal cortex in decision-making and flexible behavior. *Neuron* 110, 2743-2770.

Klimecki, O.M., Leiberg, S., Ricard, M., Singer, T., 2014. Differential pattern of functional brain plasticity after compassion and empathy training. *Social cognitive and affective neuroscience* 9, 873-879.

Klugah-Brown, B., Bore, M.C., Liu, X., Gan, X., Biswal, B.B., Kendrick, K.M., Chang, D., Zhou, B., Becker, B., 2024. The neurostructural consequences of glaucoma and their overlap with disorders exhibiting emotional dysregulations: A voxel-based meta-analysis and tripartite system model. *Journal of affective disorders*.

Klugah-Brown, B., Di, X., Zweerings, J., Mathiak, K., Becker, B., Biswal, B., 2020. Common and separable neural alterations in substance use disorders: A coordinate-based meta-analysis of functional neuroimaging studies in humans. *Human brain mapping* 41, 4459-4477.

Kucyi, A., Davis, K.D., 2015. The dynamic pain connectome. *Trends in neurosciences* 38, 86-95.

Kuis, D.J., van de Giessen, T., de Jong, S., Sportel, B.E., Boonstra, N., van Donkersgoed, R., Lysaker, P.H., Hasson-Ohayon, I., Pijnenborg, G.H.M., 2021. Empathy and Its Relationship With Social Functioning in Individuals at Ultra-High Risk for Psychosis. *Frontiers in psychiatry* 12.

Kuner, R., Kuner, T., 2021. Cellular Circuits in the Brain and Their Modulation in Acute and Chronic Pain. *Physiol Rev* 101, 213-258.

Labek, K., Sittenberger, E., Kienhöfer, V., Rabl, L., Messina, I., Schurz, M., Stingl, J.C., Viviani, R., 2023. The gradient model of brain organization in decisions involving "empathy for pain". *Cerebral cortex (New York, N.Y. : 1991)* 33, 5839-5850.

Lamm, C., Bukowski, H., Silani, G., 2016. From shared to distinct self-other representations in empathy: evidence from neurotypical function and socio-cognitive disorders. *Philosophical Transactions of the Royal Society B: Biological Sciences* 371.

Lamm, C., Decety, J., Singer, T., 2011. Meta-analytic evidence for common and distinct neural networks associated with directly experienced pain and empathy for pain. *NeuroImage* 54, 2492-2502.

Lee, J.-J., Kim, H.J., Čeko, M., Park, B.-y., Lee, S.A., Park, H., Roy, M., Kim, S.-G., Wager, T.D., Woo, C.-W., 2021. A neuroimaging biomarker for sustained experimental and clinical pain. *Nature Medicine* 27, 174-182.

Li, J., Xu, L., Zheng, X., Fu, M., Zhou, F., Xu, X., Ma, X., Li, K., Kendrick, K.M., Becker, B., 2019. Common and Dissociable Contributions of Alexithymia and Autism to Domain-Specific Interoceptive Dysregulations: A Dimensional Neuroimaging Approach. *Psychotherapy and psychosomatics* 88, 187-189.

Li, X., Liu, Y., Ye, Q., Lu, X., Peng, W., 2020. The linkage between first-hand pain sensitivity and empathy for others' pain: Attention matters. *Human brain mapping* 41, 4815-4828.

Li, X.H., Matsuura, T., Xue, M., Chen, Q.Y., Liu, R.H., Lu, J.S., Shi, W., Fan, K., Zhou, Z., Miao, Z., Yang, J., Wei, S., Wei, F., Chen, T., Zhuo, M., 2021. Oxytocin in the anterior cingulate cortex attenuates neuropathic pain and emotional anxiety by inhibiting presynaptic long-term potentiation. *Cell reports* 36, 109411.

- Li, Z., Zhang, L., Zeng, Y., Zhao, Q., Hu, L., 2023. Gamma-band oscillations of pain and nociception: A systematic review and meta-analysis of human and rodent studies. *Neuroscience and biobehavioral reviews* 146, 105062.
- Liu, X., Klugah-Brown, B., Zhang, R., Chen, H., Zhang, J., Becker, B., 2022. Pathological fear, anxiety and negative affect exhibit distinct neurostructural signatures: evidence from psychiatric neuroimaging meta-analysis. *Translational psychiatry* 12, 405.
- Liu, Z., Rolls, E.T., Liu, Z., Zhang, K., Yang, M., Du, J., Gong, W., Cheng, W., Dai, F., Wang, H., Ugurbil, K., Zhang, J., Feng, J., 2019. Brain annotation toolbox: exploring the functional and genetic associations of neuroimaging results. *Bioinformatics (Oxford, England)* 35, 3771-3778.
- Lockwood, P.L., Sebastian, C.L., McCrory, E.J., Hyde, Z.H., Gu, X., De Brito, S.A., Viding, E., 2013. Association of Callous Traits with Reduced Neural Response to Others' Pain in Children with Conduct Problems. *Current Biology* 23, 901-905.
- Lockwood, P.L., Wittmann, M.K., 2018. Ventral anterior cingulate cortex and social decision-making. *Neuroscience & Biobehavioral Reviews* 92, 187-191.
- Malezieux, M., Klein, A.S., Gogolla, N., 2023. Neural Circuits for Emotion. *Annual review of neuroscience* 46, 211-231.
- Maliske, L.Z., Schurz, M., Kanske, P., 2023. Interactions within the social brain: Co-activation and connectivity among networks enabling empathy and Theory of Mind. *Neuroscience and biobehavioral reviews* 147, 105080.
- Marek, S., Dosenbach, N.U.F., 2018. The frontoparietal network: function, electrophysiology, and importance of individual precision mapping. *Dialogues in clinical neuroscience* 20, 133-140.
- Matsuoka, K., Makinodan, M., Kitamura, S., Takahashi, M., Yoshikawa, H., Yasuno, F., Ishida, R., Kishimoto, N., Yasuda, Y., Hashimoto, R., Taoka, T., Miyasaka, T., Kichikawa, K., Kishimoto, T., 2020. Increased Dendritic Orientation Dispersion in the Left Occipital Gyrus is Associated with Atypical Visual Processing in Adults with Autism Spectrum Disorder. *Cerebral Cortex* 30, 5617-5625.
- McTeague, L.M., Huemer, J., Carreon, D.M., Jiang, Y., Eickhoff, S.B., Etkin, A., 2017. Identification of Common Neural Circuit Disruptions in Cognitive Control Across Psychiatric Disorders. *The American journal of psychiatry* 174, 676-685.
- McTeague, L.M., Rosenberg, B.M., Lopez, J.W., Carreon, D.M., Huemer, J., Jiang, Y., Chick, C.F., Eickhoff, S.B., Etkin, A., 2020. Identification of Common Neural Circuit Disruptions in Emotional Processing Across Psychiatric Disorders. *The American journal of psychiatry* 177, 411-421.
- Meng, J., Shen, L., Li, Z., Peng, W., 2019. Top-down Effects on Empathy for Pain in Adults with Autistic Traits. *Scientific reports* 9, 8022.
- Menon, V., 2023. 20 years of the default mode network: A review and synthesis. *Neuron* 111, 2469-2487.
- Moriguchi, Y., Decety, J., Ohnishi, T., Maeda, M., Mori, T., Nemoto, K., Matsuda, H., Komaki, G., 2007. Empathy and judging other's pain: An fMRI study of alexithymia. *Cerebral Cortex* 17, 2223-2234.
- Müller, V.I., Cieslik, E.C., Laird, A.R., Fox, P.T., Radua, J., Mataix-Cols, D., Tench, C.R., Yarkoni, T., Nichols, T.E., Turkeltaub, P.E., Wager, T.D., Eickhoff, S.B., 2018. Ten simple rules for neuroimaging meta-analysis. *Neuroscience and biobehavioral reviews* 84, 151-161.
- Murray, E.A., Fellows, L.K., 2021. Prefrontal cortex interactions with the amygdala in primates. *Neuropsychopharmacology : official publication of the American College of Neuropsychopharmacology* 47, 163-179.

- Nabulsi, L., Farrell, J., McPhilemy, G., Kilmartin, L., Dauvermann, M.R., Akudjedu, T.N., Najt, P., Ambati, S., Martyn, F.M., McLoughlin, J., Gill, M., Meaney, J., Morris, D., Frodl, T., McDonald, C., Hallahan, B., Cannon, D.M., 2022. Normalization of impaired emotion inhibition in bipolar disorder mediated by cholinergic neurotransmission in the cingulate cortex. *Neuropsychopharmacology : official publication of the American College of Neuropsychopharmacology* 47, 1643-1651.
- Novembre, G., Zanon, M., Silani, G., 2015. Empathy for social exclusion involves the sensory-discriminative component of pain: a within-subject fMRI study. *Social cognitive and affective neuroscience* 10, 153-164.
- Ohta, K.-i., Suzuki, S., Warita, K., Sumitani, K., Tenkumo, C., Ozawa, T., Ujihara, H., Kusaka, T., Miki, T., 2020. The effects of early life stress on the excitatory/inhibitory balance of the medial prefrontal cortex. *Behavioural brain research* 379.
- Ong, W.Y., Stohler, C.S., Herr, D.R., 2019. Role of the Prefrontal Cortex in Pain Processing. *Molecular neurobiology* 56, 1137-1166.
- Opie, G.M., Liao, W.Y., Semmler, J.G., 2022. Interactions Between Cerebellum and the Intracortical Excitatory Circuits of Motor Cortex: a Mini-Review. *Cerebellum (London, England)* 21, 159-166.
- Ou, Y., Ni, X., Gao, X., Yu, Y., Zhang, Y., Wang, Y., Liu, J., Yin, Z., Rong, J., Sun, M., Chen, J., Tang, Z., Xiao, W., Zhao, L., 2024. Structural and functional changes of anterior cingulate cortex subregions in migraine without aura: relationships with pain sensation and pain emotion. *Cerebral cortex (New York, N.Y. : 1991)* 34.
- Page, M.J., Moher, D., Bossuyt, P.M., Boutron, I., Hoffmann, T.C., Mulrow, C.D., Shamseer, L., Tetzlaff, J.M., Akl, E.A., Brennan, S.E., Chou, R., Glanville, J., Grimshaw, J.M., Hróbjartsson, A., Lalu, M.M., Li, T., Loder, E.W., Mayo-Wilson, E., McDonald, S., McGuinness, L.A., Stewart, L.A., Thomas, J., Tricco, A.C., Welch, V.A., Whiting, P., McKenzie, J.E., 2021. PRISMA 2020 explanation and elaboration: updated guidance and exemplars for reporting systematic reviews. *BMJ (Clinical research ed.)* 372, n160.
- Paradiso, E., Gazzola, V., Keysers, C., 2021. Neural mechanisms necessary for empathy-related phenomena across species. *Curr Opin Neurobiol* 68, 107-115.
- Preckel, K., Kanske, P., Singer, T., 2018. On the interaction of social affect and cognition: empathy, compassion and theory of mind. *Current Opinion in Behavioral Sciences* 19, 1-6.
- Preis, M.A., Kröner-Herwig, B., Schmidt-Samoa, C., Dechent, P., Barke, A., 2015. Neural Correlates of Empathy with Pain Show Habituation Effects. An fMRI Study. *PloS one* 10, e0137056.
- Radua, J., Mataix-Cols, D., 2018. Voxel-wise meta-analysis of grey matter changes in obsessive-compulsive disorder. *British Journal of Psychiatry* 195, 393-402.
- Radua, J., Mataix-Cols, D., Phillips, M.L., El-Hage, W., Kronhaus, D.M., Cardoner, N., Surguladze, S., 2012. A new meta-analytic method for neuroimaging studies that combines reported peak coordinates and statistical parametric maps. *European psychiatry : the journal of the Association of European Psychiatrists* 27, 605-611.
- Radua, J., Romeo, M., Mataix-Cols, D., Fusar-Poli, P., 2013. A General Approach for Combining Voxel-Based Meta-Analyses Conducted in Different Neuroimaging Modalities. *Current medicinal chemistry* 20, 462-466.
- Ruetgen, M., Pfabigan, D.M., Tik, M., Kraus, C., Pletti, C., Sladky, R., Kloibl, M., Woletz, M., Vanicek, T., Windischberger, C., Lanzenberger, R., Lamm, C., 2021. Detached empathic experience of others' pain in remitted states of depression-An fMRI study. *Neuroimage-Clinical* 31.
- Rütgen, M., Seidel, E.M., Silani, G., Riečanský, I., Hummer, A., Windischberger, C., Petrovic, P., Lamm,

- C., 2015. Placebo analgesia and its opioidergic regulation suggest that empathy for pain is grounded in self pain. *Proceedings of the National Academy of Sciences of the United States of America* 112, E5638-5646.
- Salimi-Khorshidi, G., Smith, S.M., Keltner, J.R., Wager, T.D., Nichols, T.E., 2009. Meta-analysis of neuroimaging data: A comparison of image-based and coordinate-based pooling of studies. *NeuroImage* 45, 810-823.
- Schurz, M., Tholen, M.G., Perner, J., Mars, R.B., Sallet, J., 2017. Specifying the brain anatomy underlying temporo-parietal junction activations for theory of mind: A review using probabilistic atlases from different imaging modalities. *Human brain mapping* 38, 4788-4805.
- Shackman, A.J., Salomons, T.V., Slagter, H.A., Fox, A.S., Winter, J.J., Davidson, R.J., 2011. The integration of negative affect, pain and cognitive control in the cingulate cortex. *Nature Reviews Neuroscience* 12, 154-167.
- Smith, M.L., Asada, N., Malenka, R.C., 2021. Anterior cingulate inputs to nucleus accumbens control the social transfer of pain and analgesia. *Science (New York, N.Y.)* 371, 153-159.
- Solmi, M., Radua, J., Olivola, M., Croce, E., Soardo, L., Salazar de Pablo, G., Il Shin, J., Kirkbride, J.B., Jones, P., Kim, J.H., Kim, J.Y., Carvalho, A.F., Seeman, M.V., Correll, C.U., Fusar-Poli, P., 2021. Age at onset of mental disorders worldwide: large-scale meta-analysis of 192 epidemiological studies. *Molecular psychiatry* 27, 281-295.
- Specht, K., 2019. Current Challenges in Translational and Clinical fMRI and Future Directions. *Frontiers in psychiatry* 10, 924.
- Sprooten, E., Rasgon, A., Goodman, M., Carlin, A., Leibu, E., Lee, W.H., Frangou, S., 2017. Addressing reverse inference in psychiatric neuroimaging: Meta-analyses of task-related brain activation in common mental disorders. *Human brain mapping* 38, 1846-1864.
- Strick, P.L., Dum, R.P., Fiez, J.A., 2009. Cerebellum and Nonmotor Function. *Annual review of neuroscience* 32, 413-434.
- Teng, C., Zhou, J., Ma, H., Tan, Y., Wu, X., Guan, C., Qiao, H., Li, J., Zhong, Y., Wang, C., Zhang, N., 2018. Abnormal resting state activity of left middle occipital gyrus and its functional connectivity in female patients with major depressive disorder. *BMC psychiatry* 18.
- Thiebaut de Schotten, M., Urbanski, M., Valabregue, R., Bayle, D.J., Volle, E., 2014. Subdivision of the occipital lobes: An anatomical and functional MRI connectivity study. *Cortex; a journal devoted to the study of the nervous system and behavior* 56, 121-137.
- Thirioux, B., Harika-Germaneau, G., Langbour, N., Jaafari, N., 2019. The Relation Between Empathy and Insight in Psychiatric Disorders: Phenomenological, Etiological, and Neuro-Functional Mechanisms. *Frontiers in psychiatry* 10, 966.
- Timmers, I., Park, A.L., Fischer, M.D., Kronman, C.A., Heathcote, L.C., Hernandez, J.M., Simons, L.E., 2018. Is Empathy for Pain Unique in Its Neural Correlates? A Meta-Analysis of Neuroimaging Studies of Empathy. *Frontiers in behavioral neuroscience* 12.
- Vistoli, D., Lavoie, M.-A., Sutliff, S., Jackson, P.L., Achim, A.M., 2017. Functional MRI examination of empathy for pain in people with schizophrenia reveals abnormal activation related to cognitive perspective-taking but typical activation linked to affective sharing. *Journal of Psychiatry & Neuroscience* 42, 262-272.
- Vucurovic, K., Raucher-Chéné, D., Obert, A., Gobin, P., Henry, A., Barrière, S., Traykova, M., Gierski, F., Portefaux, C., Caillies, S., Kaladjian, A., 2023. Activation of the left medial temporal gyrus and adjacent brain areas during affective theory of mind processing correlates with trait schizotypy in

a nonclinical population. *Social cognitive and affective neuroscience* 18.

Wiestler, T., McGonigle, D.J., Diedrichsen, J., 2011. Integration of sensory and motor representations of single fingers in the human cerebellum. *Journal of neurophysiology* 105, 3042-3053.

Xiang, Y., Wang, Y., Gao, S., Zhang, X., Cui, R., 2018. Neural Mechanisms With Respect to Different Paradigms and Relevant Regulatory Factors in Empathy for Pain. *Frontiers in neuroscience* 12, 507.

Xu, J., Lyu, H., Li, T., Xu, Z., Fu, X., Jia, F., Wang, J., Hu, Q., 2019. Delineating functional segregations of the human middle temporal gyrus with resting-state functional connectivity and coactivation patterns. *Human brain mapping* 40, 5159-5171.

Xu, X., Dai, J., Liu, C., Chen, Y., Xin, F., Zhou, F., Zhou, X., Huang, Y., Wang, J., Zou, Z., Li, J., Ebstein, R.P., Kendrick, K.M., Zhou, B., Becker, B., 2020. Common and Disorder-Specific Neurofunctional Markers of Dysregulated Empathic Reactivity in Major Depression and Generalized Anxiety Disorder. *Psychotherapy and psychosomatics* 89, 114-116.

Yao, S., Becker, B., Geng, Y., Zhao, Z., Xu, X., Zhao, W., Ren, P., Kendrick, K.M., 2016. Voluntary control of anterior insula and its functional connections is feedback-independent and increases pain empathy. *NeuroImage* 130, 230-240.

Yeshurun, Y., Nguyen, M., Hasson, U., 2021. The default mode network: where the idiosyncratic self meets the shared social world. *Nature reviews. Neuroscience* 22, 181-192.

Yu, G., Liu, Z., Wu, X., Becker, B., Zhang, K., Fan, H., Peng, S., Kuang, N., Kang, J., Dong, G., Zhao, X.M., Schumann, G., Feng, J., Sahakian, B.J., Robbins, T.W., Palaniyappan, L., Zhang, J., 2023. Common and disorder-specific cortical thickness alterations in internalizing, externalizing and thought disorders during early adolescence: an Adolescent Brain and Cognitive Development study. *Journal of psychiatry & neuroscience : JPN* 48, E345-e356.

Zhang, J., Cheng, W., Liu, Z., Zhang, K., Lei, X., Yao, Y., Becker, B., Liu, Y., Kendrick, K.M., Lu, G., Feng, J., 2016. Neural, electrophysiological and anatomical basis of brain-network variability and its characteristic changes in mental disorders. *Brain : a journal of neurology* 139, 2307-2321.

Zhang, W., Zhuo, S., Li, X., Peng, W., 2023. Autistic Traits and Empathy for Others' Pain Among the General Population: Test of the Mediating Effects of First-Hand Pain Sensitivity. *Journal of autism and developmental disorders* 53, 2006-2020.

Zhou, F., Geng, Y., Xin, F., Li, J., Feng, P., Liu, C., Zhao, W., Feng, T., Guastella, A.J., Ebstein, R.P., Kendrick, K.M., Becker, B., 2019. Human Extinction Learning Is Accelerated by an Angiotensin Antagonist via Ventromedial Prefrontal Cortex and Its Connections With Basolateral Amygdala. *Biological psychiatry* 86, 910-920.

Zhou, F., Li, J., Zhao, W., Xu, L., Zheng, X., Fu, M., Yao, S., Kendrick, K.M., Wager, T.D., Becker, B., 2020a. Empathic pain evoked by sensory and emotional-communicative cues share common and process-specific neural representations. *eLife* 9, e56929.

Zhou, F., Li, J., Zhao, W., Xu, L., Zheng, X., Fu, M., Yao, S., Kendrick, K.M., Wager, T.D., Becker, B., 2020b. Empathic pain evoked by sensory and emotional-communicative cues share common and process-specific neural representations. *eLife* 9.

Zhou, X., Wu, R., Zeng, Y., Qi, Z., Ferraro, S., Xu, L., Zheng, X., Li, J., Fu, M., Yao, S., Kendrick, K.M., Becker, B., 2022. Choice of Voxel-based Morphometry processing pipeline drives variability in the location of neuroanatomical brain markers. *Communications biology* 5, 913.

Zhou, Y., Shi, L., Cui, X., Wang, S., Luo, X., 2016. Functional Connectivity of the Caudal Anterior Cingulate Cortex Is Decreased in Autism. *PLoS one* 11, e0151879.

Zhuang, Q., Xu, L., Zhou, F., Yao, S., Zheng, X., Zhou, X., Li, J., Xu, X., Fu, M., Li, K., Vatansever, D., Kendrick, K.M., Becker, B., 2021. Segregating domain-general from emotional context-specific inhibitory control systems - ventral striatum and orbitofrontal cortex serve as emotion-cognition integration hubs. *NeuroImage* 238, 118269.



## Tables

**Table 1.** Demographic characteristics of the 11 fMRI studies included in the meta-analysis

| Study ID               | Disease type                    | Num. | Female (%) | Patient        |               |                 | Control        |               |
|------------------------|---------------------------------|------|------------|----------------|---------------|-----------------|----------------|---------------|
|                        |                                 |      |            | n <sub>1</sub> | Mean age (SD) | Treatment (Y/N) | n <sub>2</sub> | Mean age (SD) |
| Bird et al, 2010       | Alexithymia                     | 36   | 0%         | 18             | 34.6(13.3)    | N               | 18             | 35(12.8)      |
| Decety et al, 2009     | Conduct Disorder (CD)           | 38   | 0%         | 30             | 17(NA)        | N               | 8              | 17(NA)        |
| Fan et al, 2013        | Autism Spectrum Disorder (ASD)  | 45   | 0%         | 24             | 18.4(2.8)     | N               | 21             | 19.3(3.4)     |
| Fujino et al, 2014     | Major Depressive Disorder (MDD) | 22   | 77%        | 11             | 37.2(9.5)     | Y               | 11             | 32.3(10.5)    |
| Gu et al, 2015         | Autism Spectrum Disorder (ASD)  | 29   | 0%         | 15             | 26.2(6.4)     | N               | 14             | 26.8(7.8)     |
| Hadjikhani et al, 2014 | Autism Spectrum Disorder (ASD)  | 67   | 8%         | 36             | 23.5(8.7)     | N               | 31             | 22.5(7.5)     |
| Horan et al, 2016      | Schizophrenia                   | 42   | 31%        | 21             | 48.2(10.4)    | Y               | 21             | 46.5(7.1)     |
| Moriguchi et al, 2007  | Alexithymia                     | 30   | 83%        | 16             | 20.2(1)       | N               | 14             | 20.4(0.94)    |
| Ruetgen et al, 2021    | Major Depressive Disorder (MDD) | 96   | 70%        | 61             | 27.34(1.35)   | Y               | 35             | 27.41(1.3)    |
| Vistoli et al, 2017    | Schizophrenia                   | 48   | 17%        | 27             | 29.7(8.6)     | N               | 21             | 29.2(7.9)     |
| Xu et al, 2020         | Major Depressive Disorder (MDD) | 72   | 0%         | 37             | NA            | N               | 35             | NA            |

Abbreviation: Num, total number of subjects; n<sub>1</sub>, number of patients; n<sub>2</sub>, number of controls; Treatment, the patient whether received clinical treatment or not; Y, received treatment; N, not received treatment; NA, not available.

**Table 2.** Data characteristics of the 11 fMRI studies included in the meta-analysis

| <b>Study ID</b>        | <b>Correction</b>     | <b>Space</b> | <b>Coordinates (Pain &gt; No Pain)<sup>a</sup></b> | <b>Paradigm<sup>b</sup></b> |
|------------------------|-----------------------|--------------|----------------------------------------------------|-----------------------------|
| Bird et al, 2010       | p<0.001 uncorrected   | MNI          | HC > Alexithymia                                   | Physical Pain               |
| Decety et al, 2009     | p<0.005 uncorrected   | MNI          | CD > HC                                            | Physical Pain               |
| Fan et al, 2013        | p<0.05 corrected      | MNI          | HC > ASD                                           | Physical Pain               |
| Fujino et al, 2014     | p<0.001 uncorrected   | Talairach    | MDD > HC & HC > MDD                                | Physical Pain               |
| Gu et al, 2015         | p<0.05 uncorrected    | MNI          | ASD > HC & HC > ASD                                | Physical Pain               |
| Hadjikhani et al, 2014 | p<0.01 uncorrected    | MNI          | ASD > HC & HC > ASD                                | Expression Pain             |
| Horan et al, 2016      | p<0.05 corrected      | MNI          | SCH > HC & HC > SCH                                | Expression Pain             |
| Moriguchi et al, 2007  | p<0.005 uncorrected   | MNI          | Alexithymia > HC & HC > Alexithymia                | Physical Pain               |
| Ruetgen et al, 2021    | p<0.05 corrected      | MNI          | MDD > HC & HC > MDD                                | Expression Pain             |
| Vistoli et al, 2017    | p < 0.001 uncorrected | MNI          | HC > SCH                                           | Physical Pain               |
| Xu et al, 2020         | p<0.05 corrected      | MNI          | HC > MDD                                           | Physical Pain               |

Abbreviation: HC, Healthy Control; CD, Conduct Disorder; ASD, Autism Spectrum Disorder; SCH, Schizophrenia; MDD, Major Depressive Disorder; MNI, Montreal Neurological Institute space.

<sup>a</sup> Pain Condition: participants view images of individuals undergoing pain or injury; No Pain Condition: participants are shown neutral images devoid of pain or harm, functioning as a control; The greater than symbol (>) signifies that peak coordinate activation is higher in one group compared to another.

<sup>b</sup> Physical Pain: stimuli involve actual bodily injury or situations that suggest physical pain, prompting participants to perceive or envision the sensory experience of pain. Expression Pain: emphasizes stimuli displaying facial expressions of pain, with a focus on the emotional reaction to observed distress in others.

**Table 3.** Detailed meta-analytic results, heterogeneity tests, and publication bias.

| Comparison                                                                                                                                                                           | Cluster                              | Voxel | MNI coordinates(x,y,z) <sup>a</sup> | SDM-Z  | Voxel <i>P</i> <sup>b</sup> | Hedges'g  | <i>I</i> <sup>2</sup> | Egger test <i>P</i> <sup>c</sup> |
|--------------------------------------------------------------------------------------------------------------------------------------------------------------------------------------|--------------------------------------|-------|-------------------------------------|--------|-----------------------------|-----------|-----------------------|----------------------------------|
| Patient > Control                                                                                                                                                                    | Anterior Cingulate, Left (ACC.L)     | 69    | 0,48,0                              | 3.510  | 0.000224233                 | 0.392553  | 0.355083              | 0.931                            |
|                                                                                                                                                                                      | Middle Temporal Gyrus, Right (MTG.R) | 17    | 60, -14, -12                        | 3.699  | 0.000108063                 | 0.414338  | 0.276461              | 0.996                            |
| Patient < Control                                                                                                                                                                    | Cerebellum IV/V, Left (CE_4_5)       | 108   | -22, -48, -28                       | -3.797 | 0.000073254                 | -0.466374 | 2.347702              | 0.960                            |
|                                                                                                                                                                                      | Middle Occipital Gyrus, Left (MOG.L) | 52    | -52, -70,2                          | -4.246 | 0.000010848                 | -0.490509 | 0                     | 0.920                            |
| <sup>a</sup> MNI = Montreal Neurological Institute space<br><sup>b</sup> Voxel <i>p</i> < 0.0025 (uncorrected), significant<br><sup>c</sup> Egger test <i>p</i> < 0.05, significant. |                                      |       |                                     |        |                             |           |                       |                                  |

## Figures

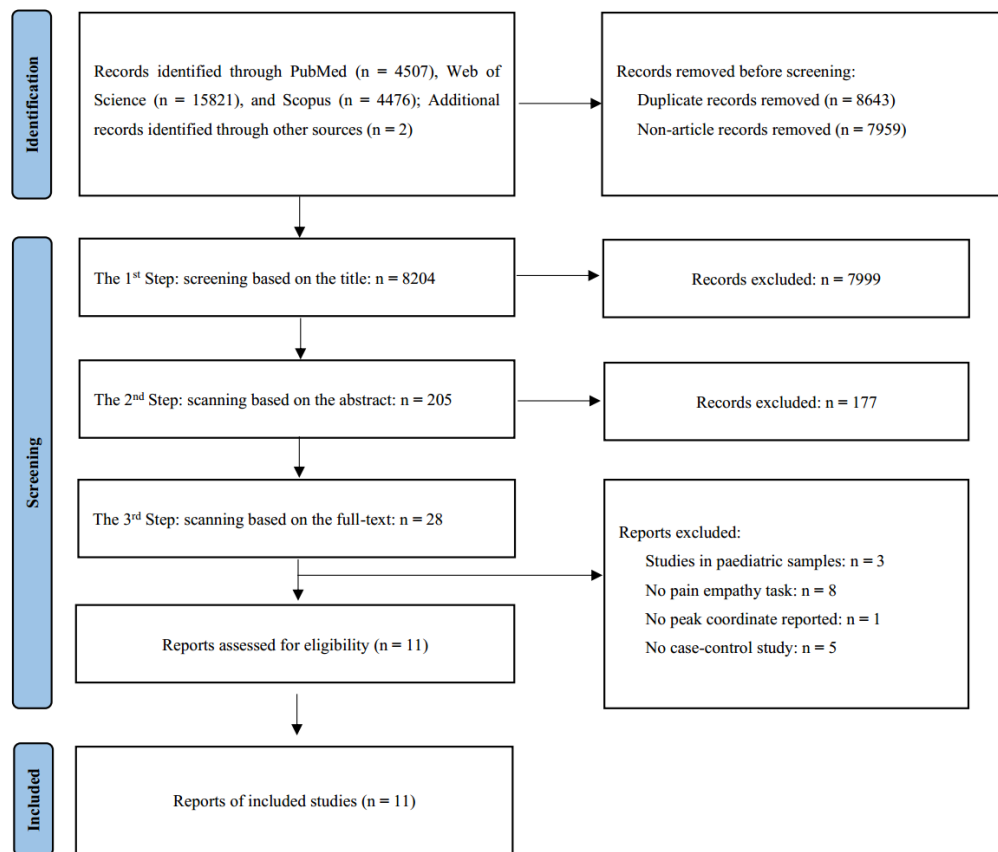

**Figure 1.** Flowchart of literature search and screening

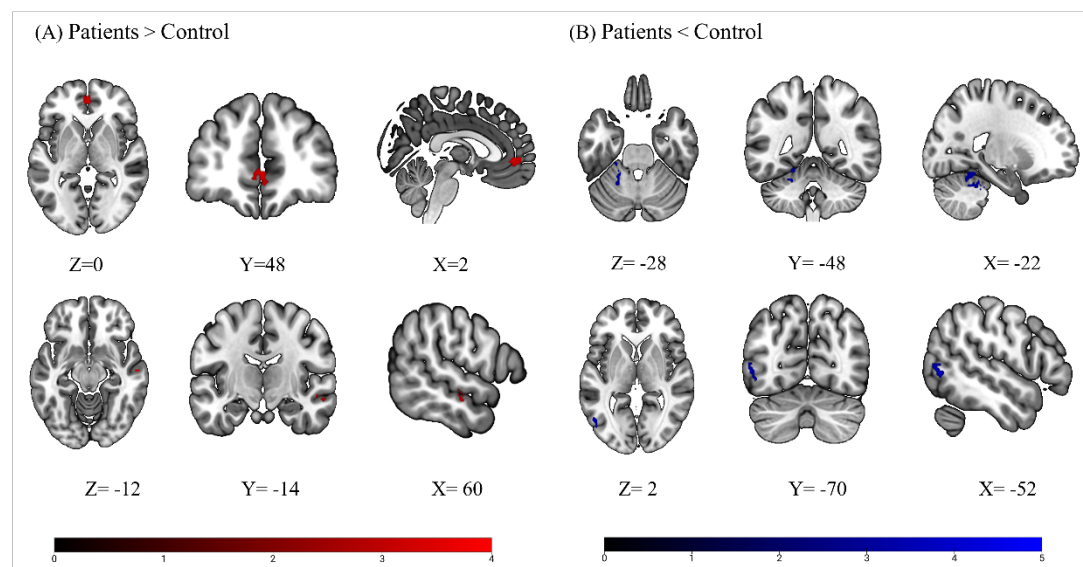

**Figure 2.** Meta-analytically determined neurofunctional alterations during pain empathy in patients with mental disorders (A) Compared to controls, patients with mental disorders exhibited increased activation in the left anterior cingulate gyrus (activation spreading to the medial prefrontal cortex) and the right middle temporal

gyrus. (B) Patients with mental disorders showed less activation in the left cerebellar area IV/V and the left middle occipital gyrus compared to controls. Results displayed at  $p < 0.0025$ , uncorrected;  $k > 10$ , coordinates reported in Montreal Neurological Institute (MNI) space.

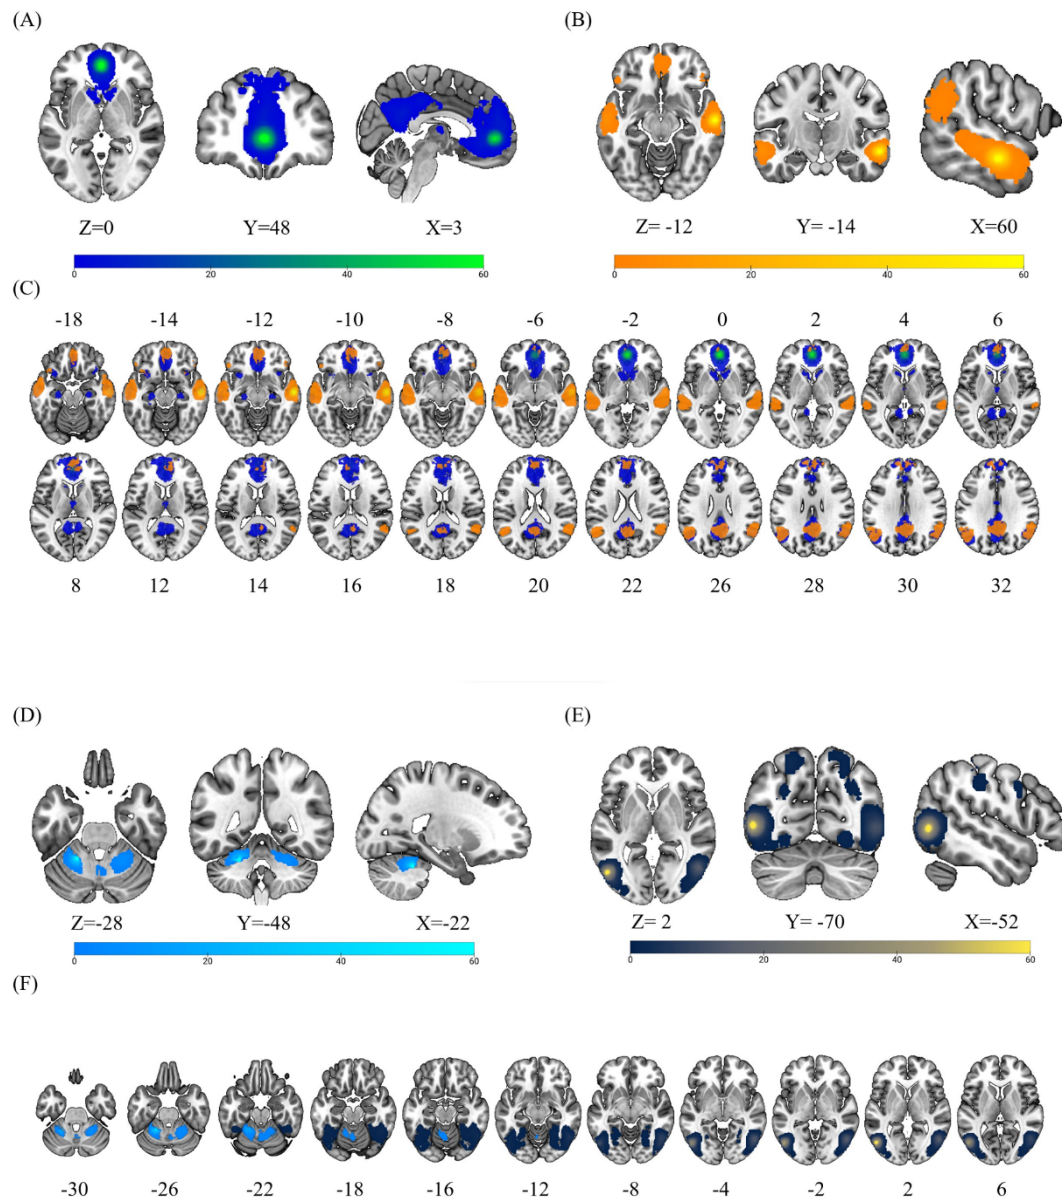

**Figure 3.** Conjunction maps between the meta-analytic resting state (intrinsic) connectivity maps and the meta-analytic co-activation (task state) maps of regions that exhibited increased and decreased pain empathic reactivity in patients with mental disorders. (A) Conjunction maps for the identified anterior cingulate region (with peak coordinates at MNI 0, 48, 0). (B) Conjunction maps for the identified middle temporal gyrus region (with peak coordinates at MNI 60, -14, -12). (C) Overlap of the two large-

scale networks identified in A and B (conjunction maps). (D) Conjunction maps for the identified cerebellum region (with peak coordinates at MNI -22, -48, -28). (E) Conjunction maps for the identified middle occipital gyrus region (with peak coordinates at MNI -52, -70, 2). (F) Overlap of the two large-scale networks identified in D and E (conjunction maps). Coordinates are in the MNI space.

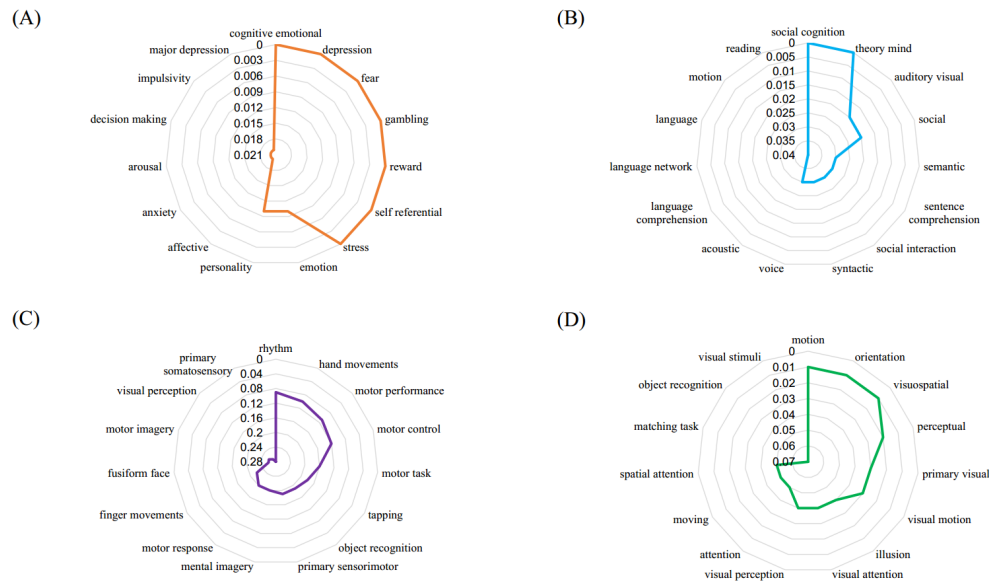

**Figure 4.** Radar chart of the top 15 behavioral terms associated with the four peak coordinates. (A) Left anterior cingulate gyrus and relevant behavioral terms. (B) Right middle temporal gyrus and relevant behavioral terms. (C) Left cerebellar IV/V and relevant behavioral terms. (D) Left middle occipital gyrus and relevant behavioral terms. Please note that a smaller  $p$ -value indicates a higher degree of correlation with the relevant brain regions.
